# Supplementary material
Source: ML conference proceedings conference paper supplement (https://openreview.net/forum?id=RsletK8757)
Supplement: supplementary_material [file PhysVidBench-Concepts.pdf › PhysVidBench/assets/PhysVidBench/images/PDFs/PhysVidBench-Concepts.pdf]

## Object Properties and Affordances

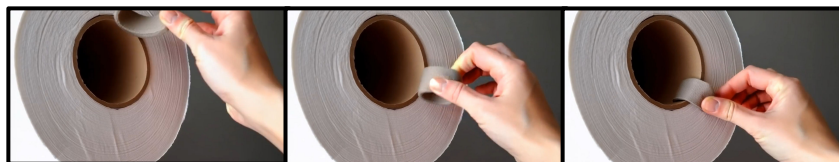

A black metal binder clip is squeezed open and placed over the blades of a razor head, covering them.

## Fundamental Physics

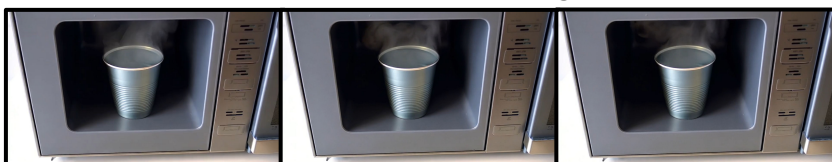

A cup of water sits inside a running microwave, steam visibly forming on the interior walls.

## Spatial Reasoning

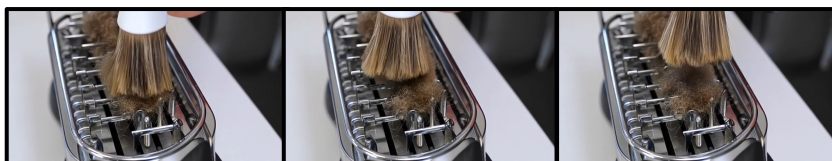

A toothbrush is brushed against a dog deshedder's metal teeth, pulling clumps of fur off the tool and on its bristles.

# PhysVidBench

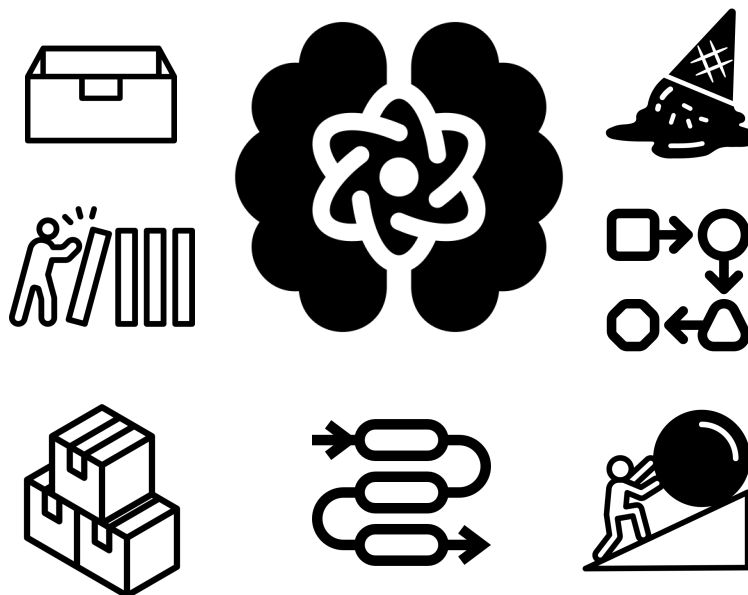

## Action and Procedural Understanding

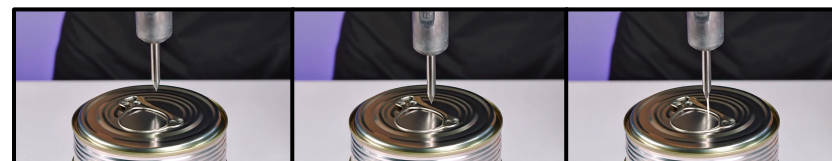

A screwdriver tip is placed on the lid of a metal can, and a hammer taps the screwdriver handle, puncturing the lid.

## Material Interaction and Transformation

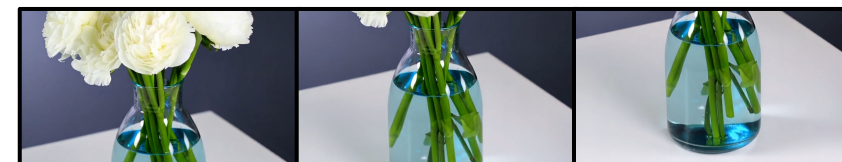

White carnations sit in a clear vase of water as drops of blue food coloring are added, tinting the water.

## Temporal Dynamics

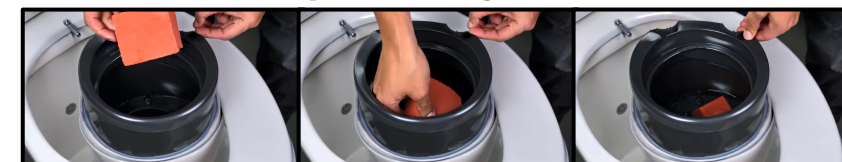

Hands lift the lid off a toilet tank and carefully lower a red brick into the water inside.

## Force and Motion

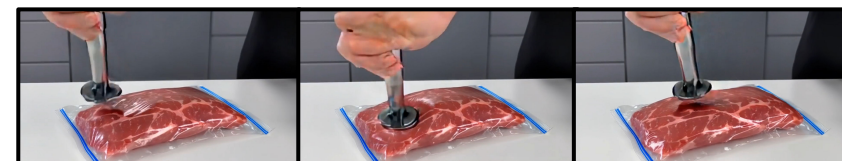

A piece of raw meat inside a sealed ziploc bag is repeatedly struck and flattened by a metal meat mallet.
