# Supplementary material
Source: ML conference proceedings conference paper supplement (https://openreview.net/forum?id=RsletK8757)
Supplement: supplementary_material [file PhysVidBench-Eval.pdf › PhysVidBench/assets/PhysVidBench/images/PDFs/PhysVidBench-Eval.pdf]

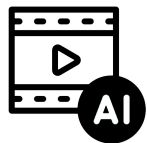

## Stage 1

Physics-Grounded  
Question Generation

### Upsampled Video Prompts

(from Video Generation Pipeline)

Enriched with Physical Details and Causal Clarity

### Generate Yes/No Questions

- Aligned with 7 Physical Commonsense Dimensions
- Generated using Upsampled Prompts

Ground truth answer is **Always** Yes.

Answerable **SOLELY** by inspecting the upsampled prompts  
(no external knowledge needed)

### Output

Physics-Grounded Questions Targeting Different Dimensions

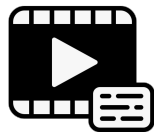

## Stage 2

Dense Video Captioning

### AuroraCap

(Video Captioning Model)

Generate 8 different dense captions per each video

### Captioning Strategy

1 x General-Purpose Caption  
7 x Dimension-Targeted Captions

### Commonsense Dimensions

- Fundamental Physics
- Object Properties & Affordances
- Spatial Reasoning
- Temporal Dynamics
- Action & Procedural Understanding
- Material Interaction & Transformation
- Force and Motion

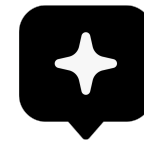

## Stage 3

LLM as a Judge

### Targeted Yes/No Physics Questions

(from Stage 1)

### Ask Questions

Ask targeted physics questions based on the generated captions.

### Scoring Logic

If LLM output is Yes (at least for one of the 8 captions), count as correct

### Reliable and Interpretable Physical Commonsense Score

More reliable than traditional VQA or direct VLM scoring

### Final Model Accuracy

Compute proportion of correctly answered questions
