# Supplementary material
Source: ML conference proceedings conference paper supplement (https://openreview.net/forum?id=RsletK8757)

## Real-World Videos

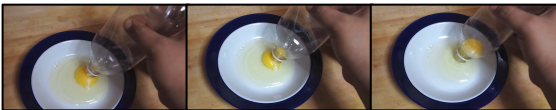

Hands squeeze an empty plastic water bottle, place the opening over an egg yolk in a bowl, and release the squeeze, sucking the yolk into the bottle, leaving the white behind.

**Tested concepts:** fundamental physics (🏋️), object properties & affordances (📦), spatial reasoning (🧱), action & procedural understanding (🌀) force and motion (🎯)

## Synthetically Generated Videos

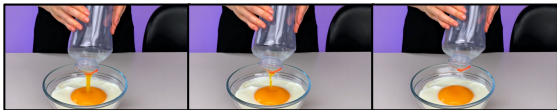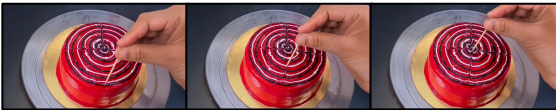

A toothpick drags through drizzled sauce on top of frosting, creating wavy lines.

**Tested concepts:** object properties & affordances (📦), spatial reasoning (🧱), material interaction & transformation (🔪), force and motion (🎯)

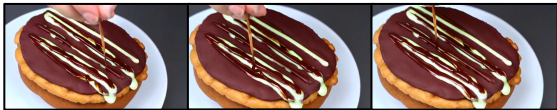

Supplement: supplementary_material [file PhysVidBench-Teaser.pdf › PhysVidBench/assets/PhysVidBench/images/PDFs/PhysVidBench-Teaser.pdf]
